# Supplementary material
Source: PubMed Central journal article supplement (PMC2393797)

**rWSN wt**

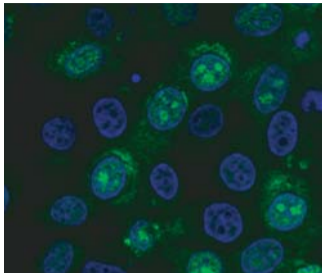

**rNS1-RSKV**

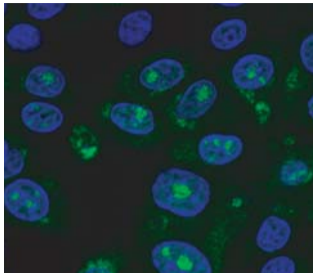

**rNS1-KSEV**

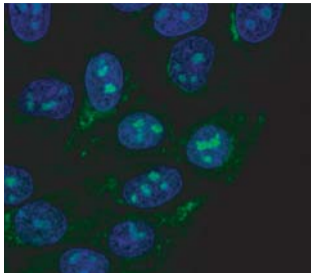

**rNS1-ESEV**

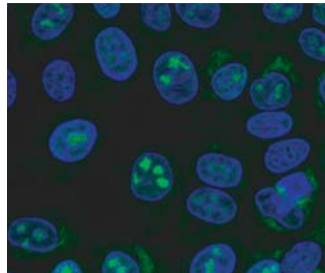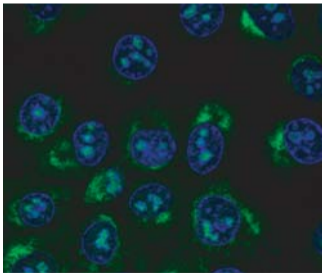

**rNS1-ESEV+7**

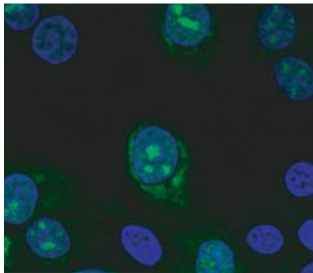

**rNS1-EPEV**

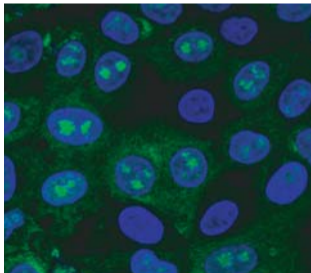

**rNS1-trunc**

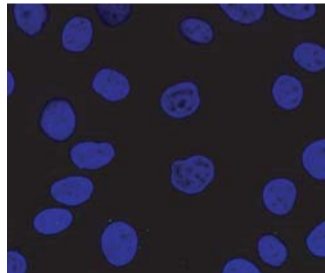

**uninfected**

Supplement: pnas_0800482105_1.pdf [file pnas_0800482105_1.pdf]

**A**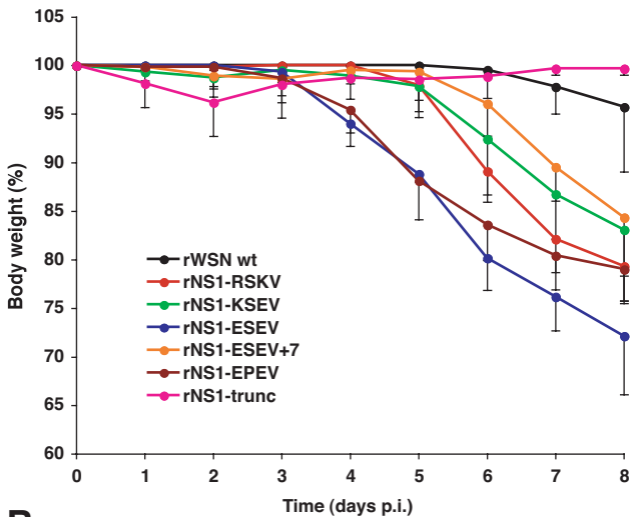**B**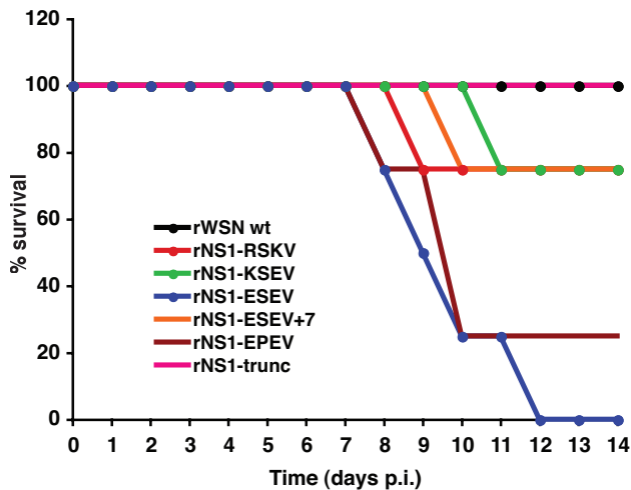

Supplement: pnas_0800482105_2.pdf [file pnas_0800482105_2.pdf]

**IFN- $\beta$**

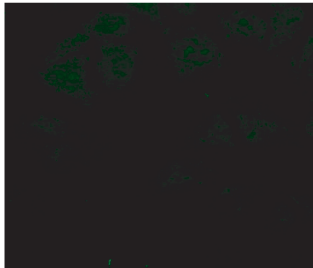

**rWSN wt**

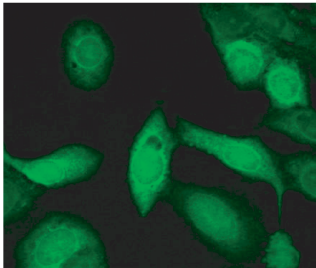

**rNS1-RSKV**

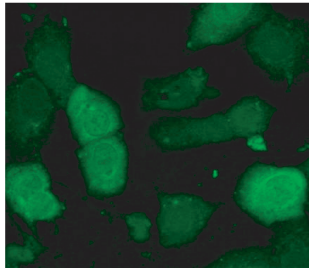

**rNS1-KSEV**

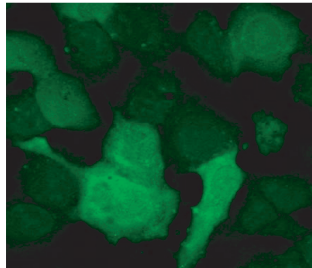

**rNS1-ESEV**

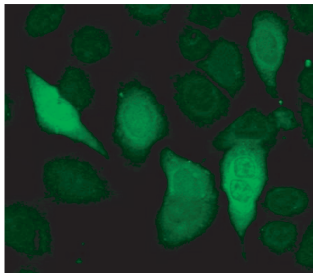

**rNS1-ESEV+7**

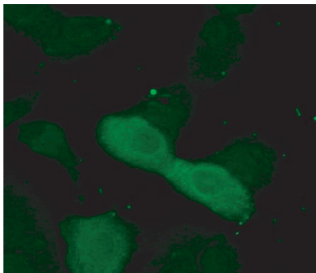

**rNS1-EPEV**

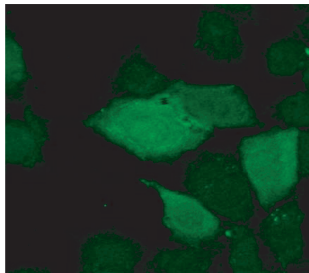

**rNS1-trunc**

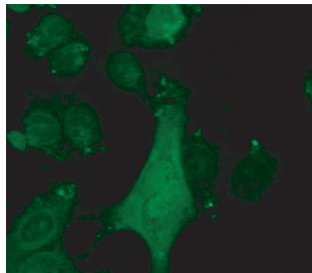

Supplement: pnas_0800482105_3.pdf [file pnas_0800482105_3.pdf]

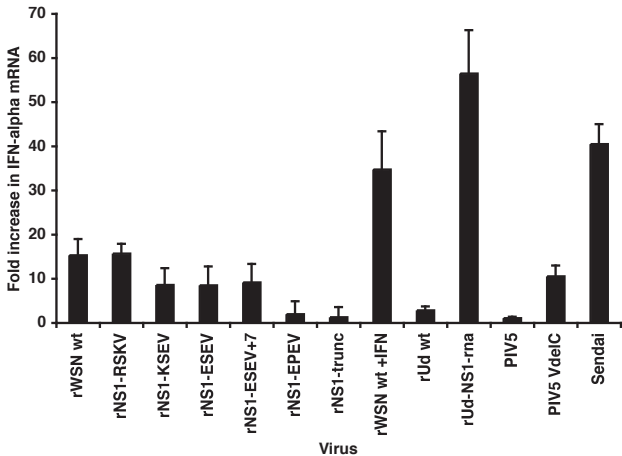

Supplement: pnas_0800482105_4.pdf [file pnas_0800482105_4.pdf]
